# Supplementary material for: A crRNA/Cas12a complex-driven rapid and visual detection method for four porcine diarrhea viruses
Source: Research Square preprint supplement (doi:10.21203/rs.3.rs-7675377/v1), 2025-11-07
Supplement: Supplementary file 1 [file 46d43e7a4786e97c11f73395.docx]

# Supplementary materials

**Table S1.** Sequence details of crRNAs, probes, and LAMP primers utilized in this study.

| Name | | | Sequences（5’→3’） |
| --- | --- | --- | --- |
| PEDV-crRNA1-F | | | TAATACGACTCACTATAGG-AATTTCTACTAAGTGTAGAT AAAAGTTCAGCCAGCCCGCG |
| PEDV-crRNA1-R | | | CGCGGGCTGGCTGAACTTTTATCTACACTTAGTAGAAA  TTCCTATAGTGAGTCGTATTA |
| PEDV-crRNA2-F | | | TAATACGACTCACTATAGG-AATTTCTACTAAGTGTAGAT TCAGAAATTTCCGCGGGCTG |
| PEDV-crRNA2-R | | | CAGCCCGCGGAAATTTCTGAATCTACACTTAGTAGAAA  TTCCTATAGTGAGTCGTATTA |
| PEDV-crRNA3-F | | | TAATACGACTCACTATAGG-AATTTCTACTAAGTGTAGAT CGCGGGCTGGCTGAACTTTT |
| PEDV-crRNA3-R | | | AAAAGTTCAGCCAGCCCGCGATCTACACTTAGTAGAAA  TTCCTATAGTGAGTCGTATTA |
| TEDV-crRNA4-F | | | TAATACGACTCACTATAGG-AATTTCTACTAAGTGTAGAT  TAGACCGAGATCTAGATTGA |
| TEDV-crRNA4-R | | | TCAATCTAGATCTCGGTCTAATCTACACTTAGTAGAAAT  TCCTATAGTGAGTCGTATTA |
| TEDV-crRNA5-F | | | TAATACGACTCACTATAGG-AATTTCTACTAAGTGTAGAT  AGTGCGGCAAGAACAGCTTG |
| TEDV-crRNA5-R | | | CAAGCTGTTCTTGCCGCACTATCTACACTTAGTAGAAA  TTCCTATAGTGAGTCGTATTA |
| TEDV-crRNA6-F | | | TAATACGACTCACTATAGG-AATTTCTACTAAGTGTAGAT TGTGTCAACACCTAACTTTT |
| TEDV-crRNA6-R | | | AAAAGTTAGGTGTTGACACAATCTACACTTAGTAGAAA  TTCCTATAGTGAGTCGTATTA |
| PCoDV-crRNA7-F | | | TAATACGACTCACTATAGG-AATTTCTACTAAGTGTAGAT  TCTGGTGTAACGCAGCCAGT |
| PCoDV-crRNA7-R | | | ACTGGCTGCGTTACACCAG AATCTACACTTAGTAGAAA  TTCCTATAGTGAGTCGTATTA |
| PCoDV-crRNA8-F | | | TAATACGACTCACTATAGG-AATTTCTACTAAGTGTAGAT  GTGGCAATGGAGTTCCGCTT |
| PCoDV-crRNA8-R | | | AAGCGGAACTCCATTGCCACATCTACACTTAGTAGAAA  TTCCTATAGTGAGTCGTATTA |
| PCoDV-crRNA9-F | | | TAATACGACTCACTATAGG-AATTTCTACTAAGTGTAGAT  GACGGGTTTGATGGCGGAGT |
| PCoDV-crRNA9-R | | | ACTCCGCCATCAAACCCGTCATCTACACTTAGTAGAAA  TTCCTATAGTGAGTCGTATTA |
| PoRV-crRNA10-F | | | TAATACGACTCACTATAGG -AATTTCTACTAAGTGTAGAT  AGTTGATGCTTCAGTAGG |
| PoRV-crRNA10-R | | | CCTACTGAAGCATCAACTATCTACACTTAGTAGAAA  TTCCTATAGTGAGTCGTATTA |
| PEDV-F3 | GAGTTCCGCTTAACTCCGC | | |
| PEDV-B3 | GGTGGTTTCCAGTATGTGGT | | |
| PEDV-FIP | ACGCTTCTGCATTTTCCCGCTC-GAGCAGCACCCTGTAACG | | |
| PEDV-BIP | ATGTACACGTCATTGTGGGGCC-CCGGGTCTGCAAAATTAGCA | | |
| PEDV-LF | TTCAAAAGTTCAGCCAGCCC | | |
| PEDV-LB | ACCTGGGTGTGGTAAAAGCA | | |
| TEDV-F3 | GCCAGGCGAATTTCAACT | | |
| TEDV-B3 | TAGAACGAGAGCGTTGCT | | |
| TEDV-FIP | TGCCTCTAGATTGAGATCTGTTTCTGAAGTTAACCAGTCAAGGGA | | |
| TEDV-BIP | GCAACAATCCAATAACAAGAAGGATTTTTCTGTGTCAACACCTAAC | | |
| TEDV-LF | | TGAGAGCGTGACCTTGAATTG | |
| TEDV-LB | | GACAGTGTAGAACAAGCTGTTCTTG | |
| PDCoV-F3 | | GAGTTCCGCTTAACTCCGC | |
| PDCoV-B3 | | AGTGTCAGCTCCCGAACC | |
| PDCoV-FIP | | ATACTGGCACAGGTCCCAGAGGGAGTGGTTGCTGGGGTATC | |
| PDCoV-BIP | | ATACTGGCACAGGTCCCAGAGGGAGTGGTTGCTGGGGTATC | |
| PDCoV-LB | | TCTTAAGTATGGTGAACTCCCTCCT | |
| PoRV G9-F3 | | TACTGGCTCCATGGACAC | |
| PoRV G9-B3 | | CACAATAAAGTTGTGGGTCA | |
| PoRV G9-FIP | | ATTTGAGTTGATGCTTCAGTAGGATCAAATTCGTCACAACAAGAAAC | |
| PoRV G9-BIP | | TATCCCAATTGTTCTTGACTAAGGGGAGAATGAAGCGATATTAGTGTA | |
| PoRV G9-LB | | TGGCCAACTGGATCAGTTTACT | |
| FAM-BHQ-ssDNA | | 5’-(FAM)CCGGAAAAAAAAAAACCGG(BHQ1)-3' | |
| FAM-Biotin-ssDNA | | 5’-(FAM)CCGGAAAAAAAAAAACCGG(Biotin)-3' | |


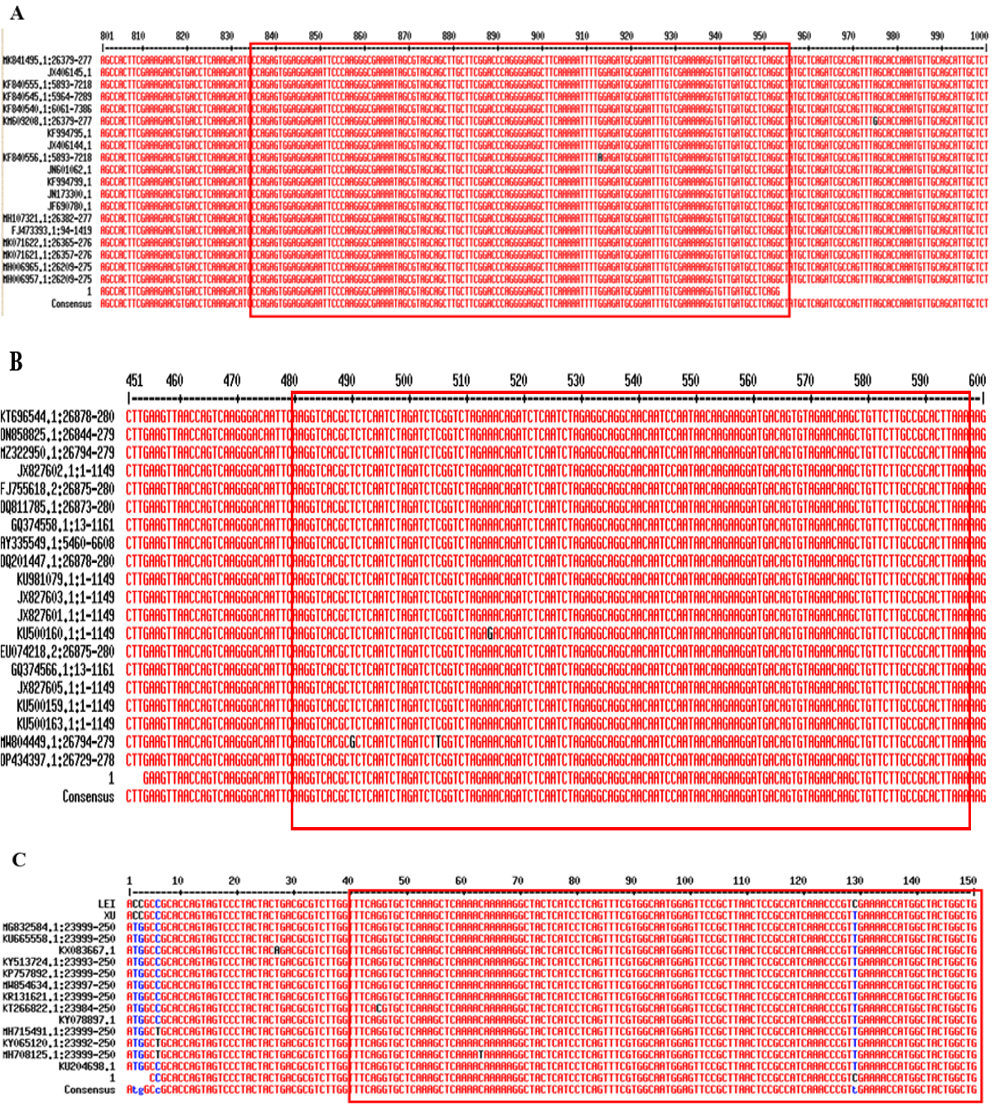


**Figure S1.** Nucleotide sequences alignment of different PEDV, TGEV and PDCoV strains. A, B and C display the sequence comparison results of the *N* gene from various PEDV, TGEV and PDCoV strains, respectively. The regions highlighted in the red boxes represent conserved sequences that were used for designing crRNA and LAMP primers.


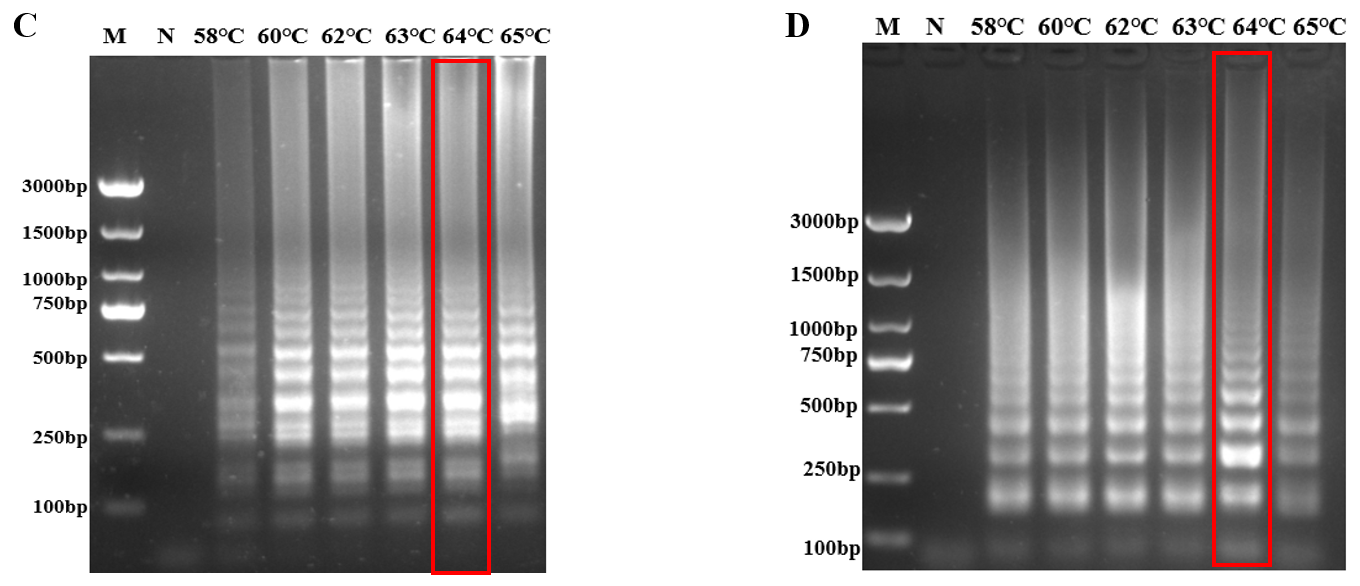

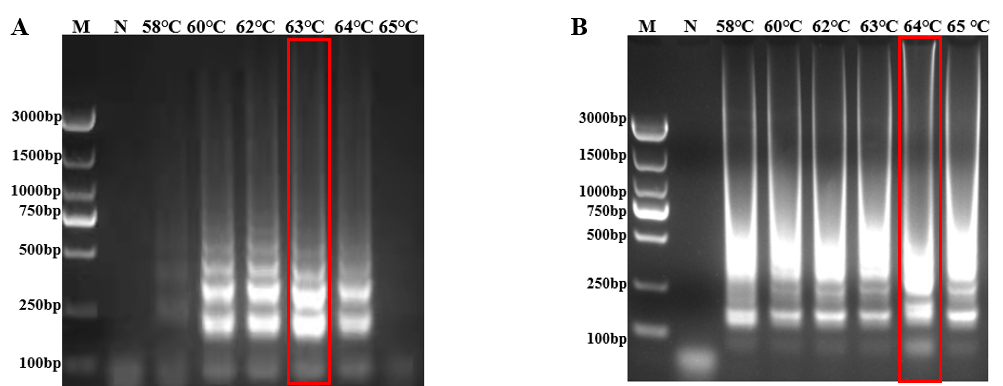


**Figure S2.** Electrophoretic analysis of LAMP reaction temperatures optimization. M: DL3000 DNA Marker; N: negative control group; Red boxes indicate the optimal reaction temperature for each target; A, B, C and D show the LAMP temperature optimization results for PEDV, TGEV, PDCoV and PoRV G9, respectively.


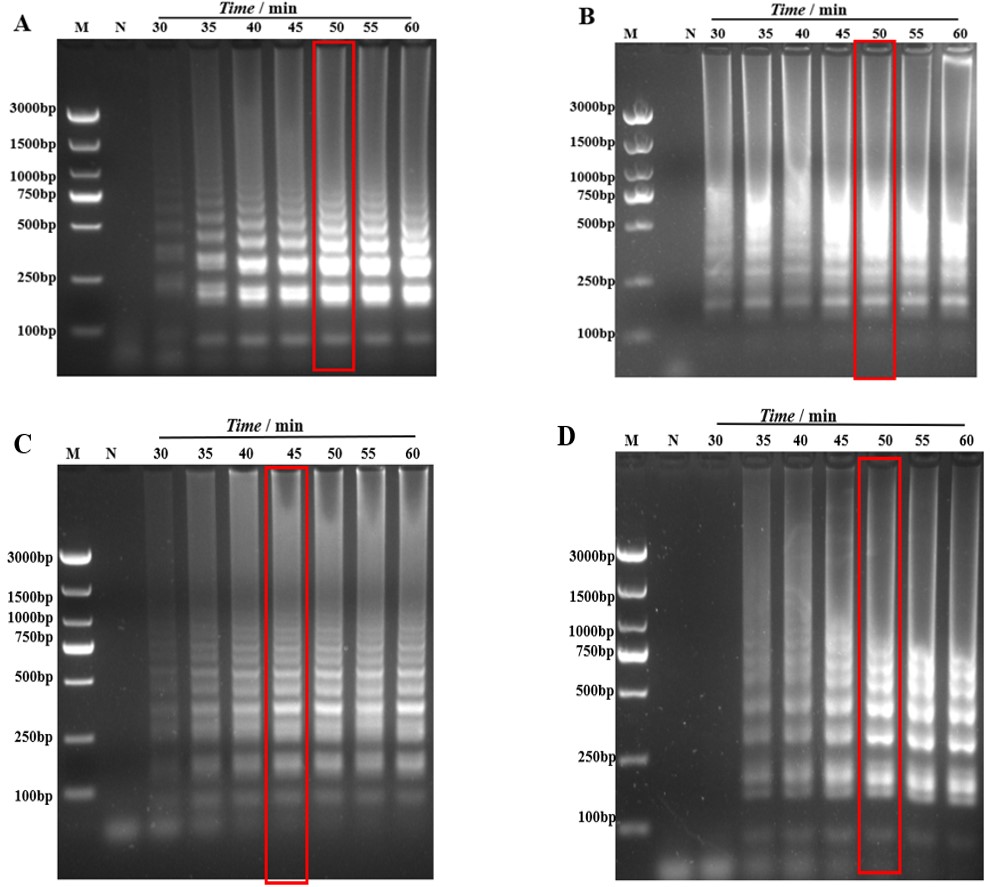


**Figure S3.** Electrophoretic analysis of LAMP reaction time optimization. M: DL3000 DNA Marker; N: Negative control; Red boxes indicate the optimal reaction time for each target; A, B, C and D display the time optimization results for PEDV, TGEV, PDCoV and PoRV G9, respectively.


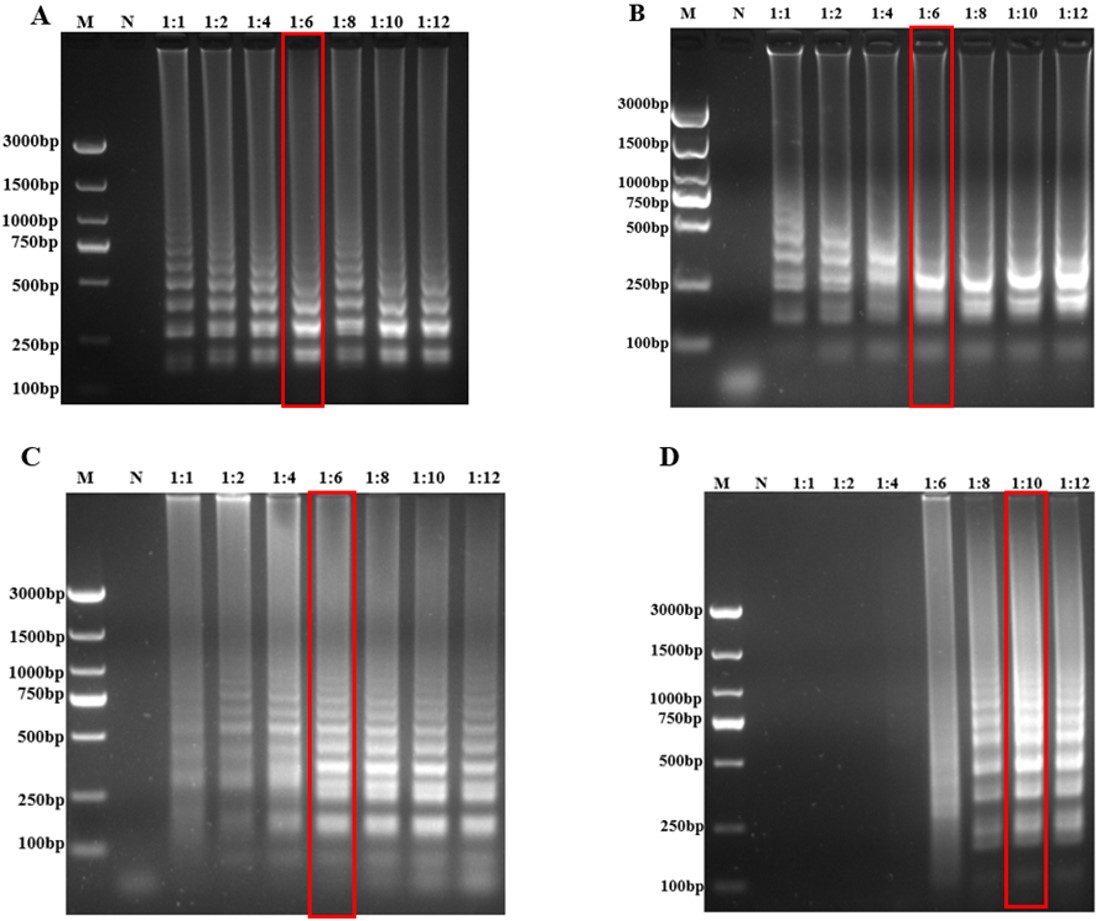


**Figure S4.** Electrophoretic analysis of FIP and BIP primer concentration ratio optimization. M: DL3000 DNA Marker; N: Negative control; Red boxes highlight the optimal outer-to-inner primer ratio bands; A, B, C and D shwo the optimization results for the outer-to-inner primer concentration ratios for PEDV, TGEV, PDCoV and PoRV G9 in the LAMP assays.


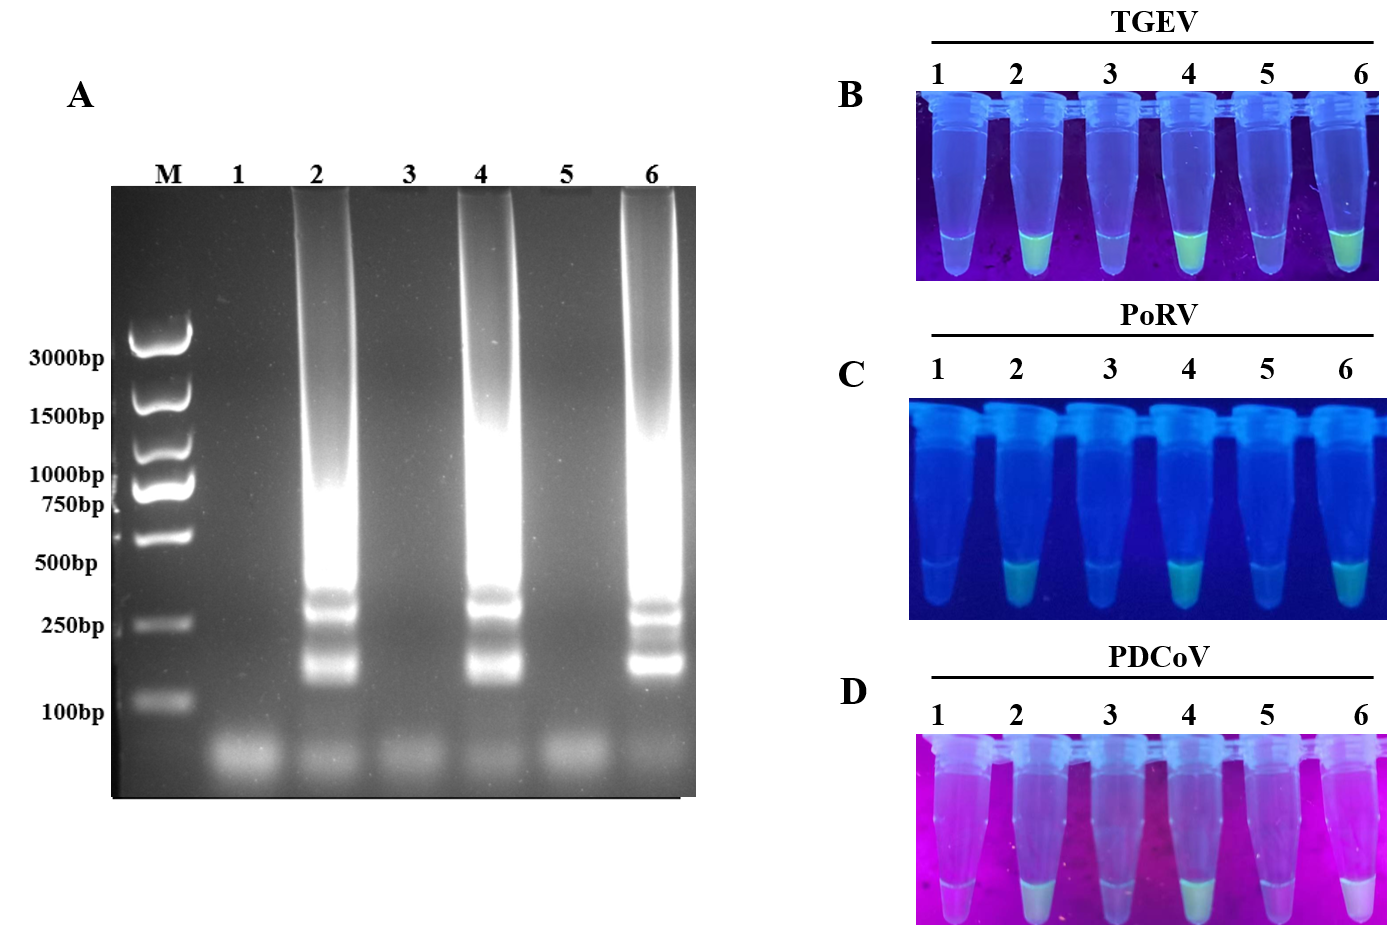


**Figure S5**. Results of the double LAMP-CRISPR detection system. (A) Gel electrophoresis results of the double LAMP assay. (B, C, E and F) Verification results of the double LAMP-CRISPR visual detection. Lanes 1, 3, and 5 represent negative controls; lanes 2, 4, and 6 represent template test groups with double LAMP amplification products; M: DL3000 DNA marker.


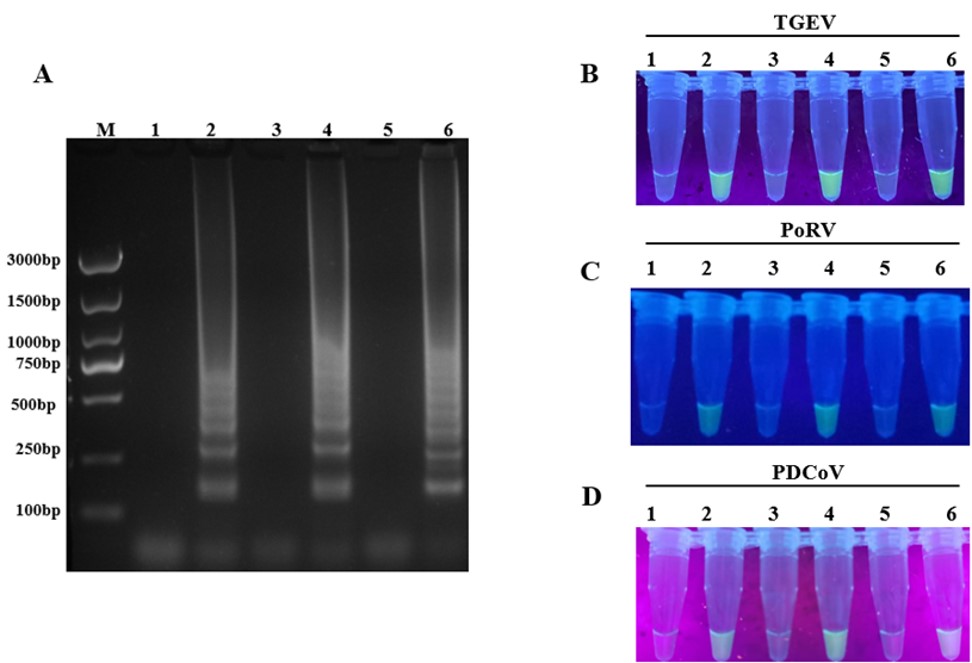


**Figure S6**. Results of the triple LAMP-CRISPR detection system. (A) Gel electrophoresis results of the triple LAMP assay. (B, C, E and F) Verification results of the triple LAMP-CRISPR visual detection. Lanes 1, 3, and 5 represent negative controls; lanes 2, 4, and 6 contain template test groups with triple LAMP amplification products; M: DL3000 DNA marker.
